# Supplementary material
Source: Springer Nature journal article supplement (https://www.springermedizin.de/resource/supplementary/12936_2011_1760_MOESM1_ESM.pdf/9541654)
Supplement: MOESM1 [file 9541654]

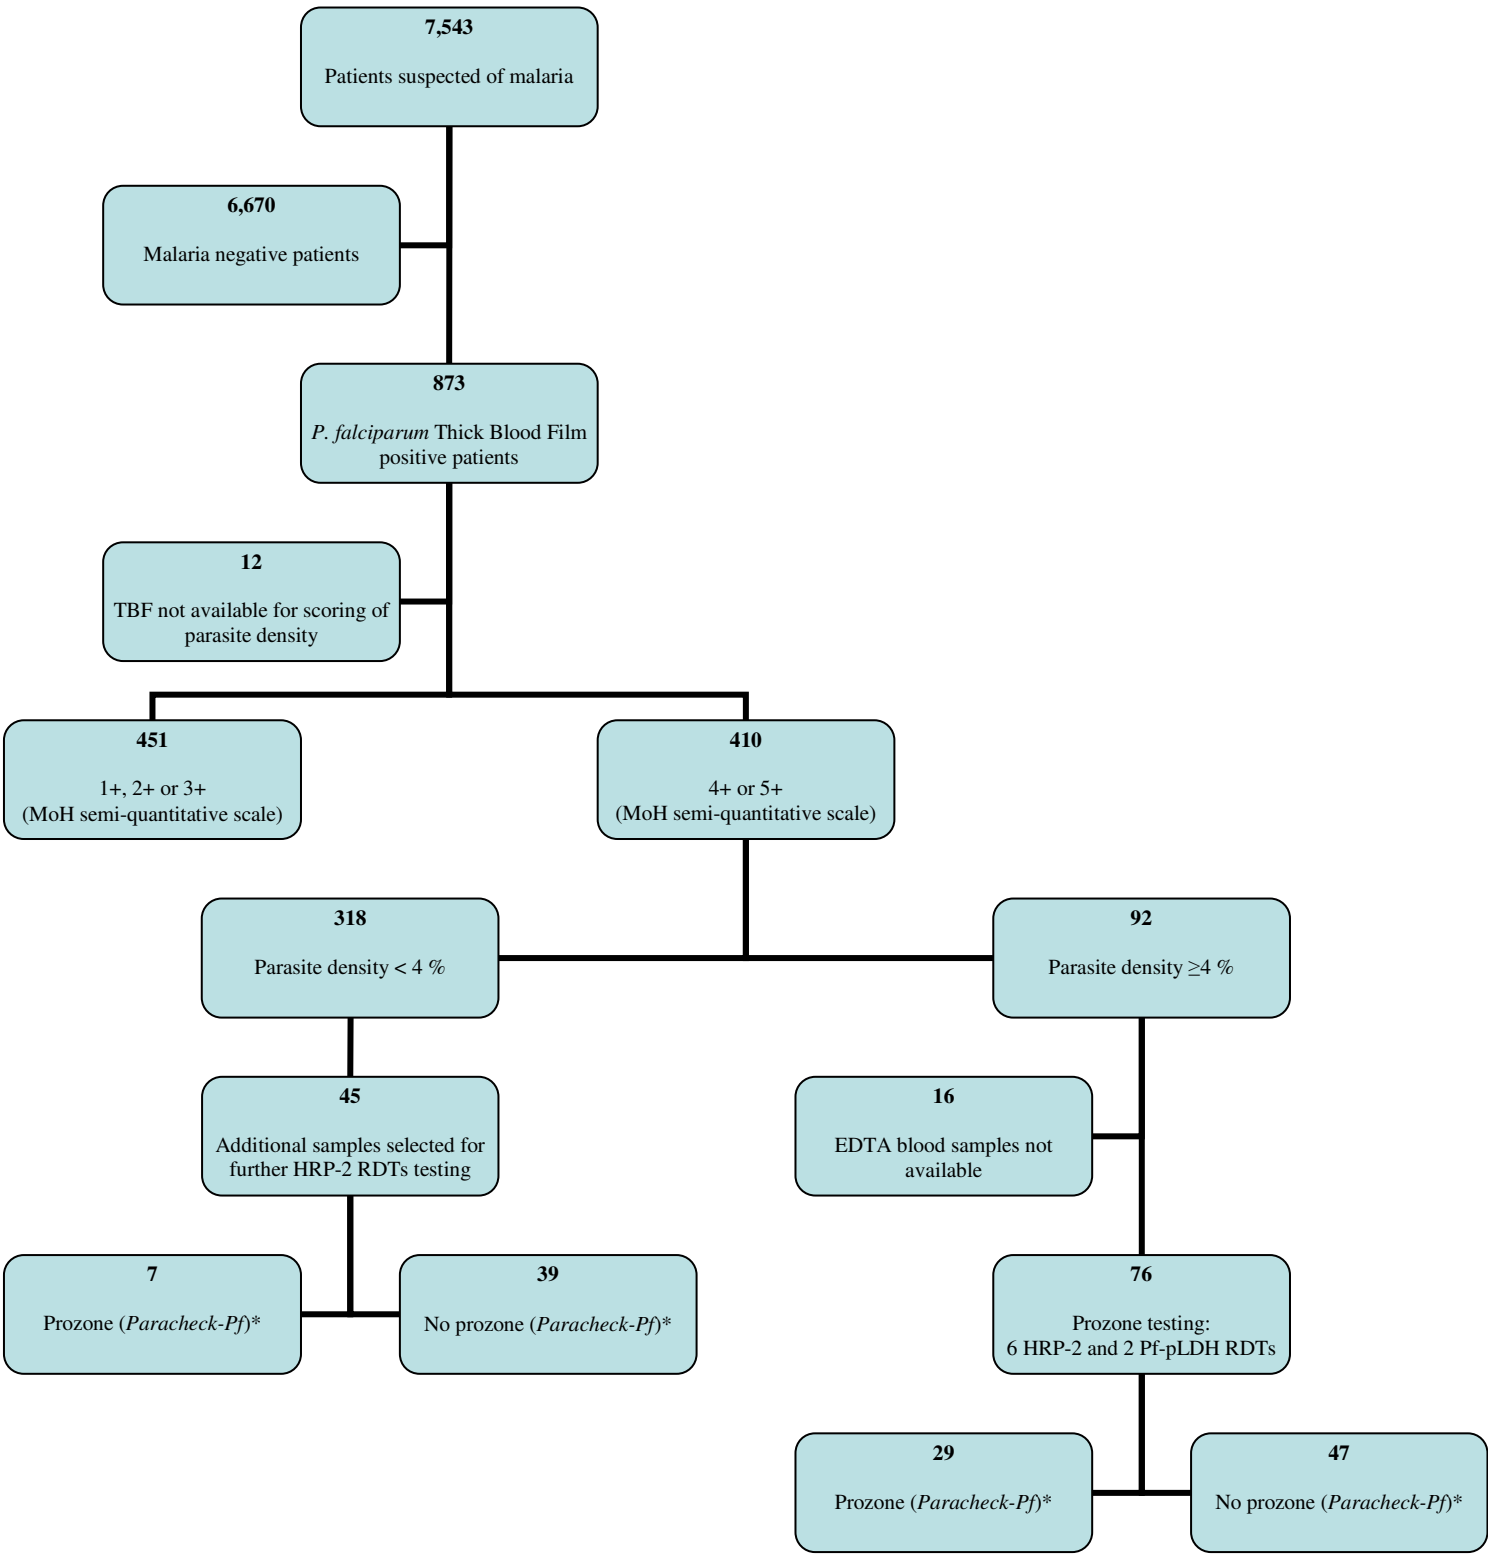

7,543

Patients suspected of malaria

6,670

Malaria negative patients

873

*P. falciparum* Thick Blood Film  
positive patients

12

TBF not available for scoring of  
parasite density

451

1+, 2+ or 3+  
(MoH semi-quantitative scale)

410

4+ or 5+  
(MoH semi-quantitative scale)

318

Parasite density < 4 %

92

Parasite density ≥ 4 %

45

Additional samples selected for  
further HRP-2 RDTs testing

16

EDTA blood samples not  
available

7

Prozone (*Paracheck-Pf*)\*

39

No prozone (*Paracheck-Pf*)\*

76

Prozone testing:  
6 HRP-2 and 2 Pf-pLDH RDTs

29

Prozone (*Paracheck-Pf*)\*

47

No prozone (*Paracheck-Pf*)\*
